# Supplementary material for: A Feature-Based Approach to Modeling Protein–DNA Interactions
Source: PLOS journal article supplement (doi:10.1371/journal.pcbi.1000154), 2008-08-21
Supplement: S3 (10.1371/journal.pcbi.1000154.s003) [file journal.pcbi.1000154.s003]

301 Moved Permanently

# Moved Permanently

The document has moved here.

---

Apache Server at www.ploscompbiol.org Port 80
