# Supplementary material for: A Feature-Based Approach to Modeling Protein–DNA Interactions
Source: PLOS journal article supplement (doi:10.1371/journal.pcbi.1000154), 2008-08-21
Supplement: S4 (10.1371/journal.pcbi.1000154.s004) [file journal.pcbi.1000154.s004]

## Supplemental Results

### Comparing our FMM Motif Finder to Other Available Motif Finders.

We sought to test our motif finder's performance versus other available motif finder software. A variety of such tools exists, and the question arises: What are the benefits of using our motif finder, as FMM motif models can be learned from aligned TFBSs that are extracted from the data by any other motif finder. As data, we chose most of the datasets described in Table 1: *NRSF*, *CTCF*, *P53\_PET3*, *c-Myc\_PET3*, *Oct4\_Loh*, *Nanog\_Loh*, *Oct4\_Boyer*, *Nanog\_Boyer*, *Sox2\_Boyer*. For each set, we used the 5-fold cross validation (CV) scheme that we used in section "*Results: Learning TF Binding Specificities Features from Unaligned Human and Mouse TF Bound Regions*".

For each dataset, we used the following protocol:

- (1) For each CV group, and for each motif finder: run with the training data as input, and acquire putative aligned TFBSs for the best motif.
- (2) For each CV group, and for each motif finder: learn both a FMM and a PSSM representation of the best motif, from the aligned TFBSs generated in step 1.
- (3) For each CV group, and for each motif finder: score each of the test sequences (positive and negative) by the log-likelihood of the best hit of the FMM in that sequence (*FMM\_score*), and similarly with the PSSM (*PSSM\_score*, so each sequence has two scores). (Repeat also for the train sequences).
- (4) For each CV group, and for each motif finder: rank all test sequences (positive and negative) by their *FMM\_score* (from highest to lowest). Using ROC (receiver operator characteristic) analysis, based on the above ranking, calculate the AUC (the area under the ROC curve), as a measure of how well the FMM discriminates the positive set from the negative set (an AUC of 0.5 is no better than random, the higher the AUC the better the discrimination). Call this AUC *FMM\_AUC* and use it as a score of the FMM. Similarly, calculate the *PSSM\_AUC*. (Repeat also for the train sequences).
- (5) For each motif finder other than our FMM motif finder: for each CV group, calculate the differences: "*FMM\_AUC*(FMM motif finder) - *FMM\_AUC*(other motif

finder)", "PSSM\_AUC(FMM motif finder) - PSSM\_AUC(other motif finder)", "FMM\_AUC(FMM motif finder) - PSSM\_AUC(other motif finder)". Calculate the means and standard deviations of the above differences over the five CV groups. (Here the protocol ends).

To follow the above protocol, we sought to compare our motif finder to other motif finders that output aligned TFBSs (as required by step 1). Different motif finders may find motifs of different lengths, thus they cannot be compared directly based on the likelihood of their best hits (*FMM\_score* and *PSSM\_score*). Since we expect a true motif to discriminate between the positive and negative sets, we chose the AUC score as a basis for comparison. This score eliminates the fear of motif-length related bias in favor of any of the motif finders. As we used a discriminative score, and as our FMM motif finder is discriminative, we sought to test our motif finder also versus a discriminative motif finder. To meet the above, we compared our motif finder's performance with three other: *AlignACE* [1], *MDscan* [2] and *DEME* [3]. The first two are non discriminative, thus were run using only the positive training sequences sets as input. The last is a state-of-the-art discriminative motif finder, thus received the negative training sequences sets as well (as did our own motif finder). The three motif finders were run with default parameters. *MDscan* and *DEME* require that the motif width be given as input. For that matter we used the lengths of the best motifs found by our motif finder for the datasets (see below in "*Supplemental Results: De-Novo Motifs*"). The comparison results are summarized in **Figures S6-S8**.

**Figure S6** shows the results when we compared PSSMs learned by our motif finder to PSSMs learned by the other tools. In a majority of the cases, our PSSMs were found to better represent the motif. This supports the claim that our motif finder does not produce aligned TFBSs that are wrongfully biased against the PSSM representation.

**Figure S7** shows the results when we compared FMMs learned by our motif finder to PSSMs learned by the other tools. In a majority of the cases our FMMs were found to better represent the motif. This supports our basic claim that producing FMM motif models using our motif finder has an advantage over the

PSSMs that other motif finders produce.

**Figure S8** shows the results when we compared FMMs learned by our motif finder to FMMs learned by the other tools. In a majority of cases our FMMs were found to better represent the motif. This demonstrates the advantage of using our motif finder in order to learn FMM motif models.

**Figure S6**

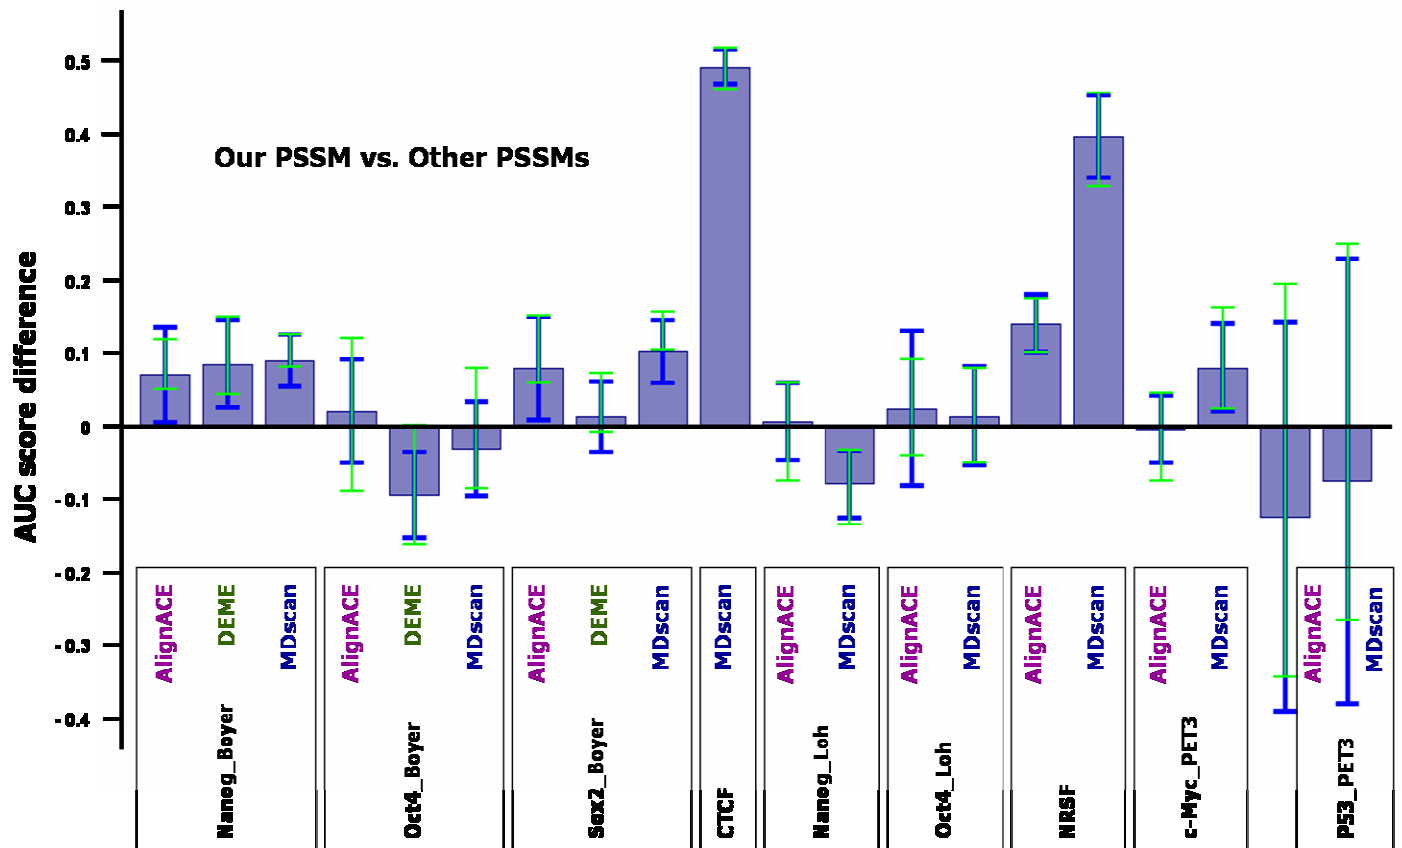

**Differences between AUC Scores of our PSSMs and the other motif finders PSSMs.** The means and the standard deviations (calculated over the five CV groups) of the difference between our PSSM AUC score and the other tool PSSM AUC score. The blue bars and error bars are for AUC scores based on the test data. The light green error bars are for AUC scores based on the train data.



**Figure S7**

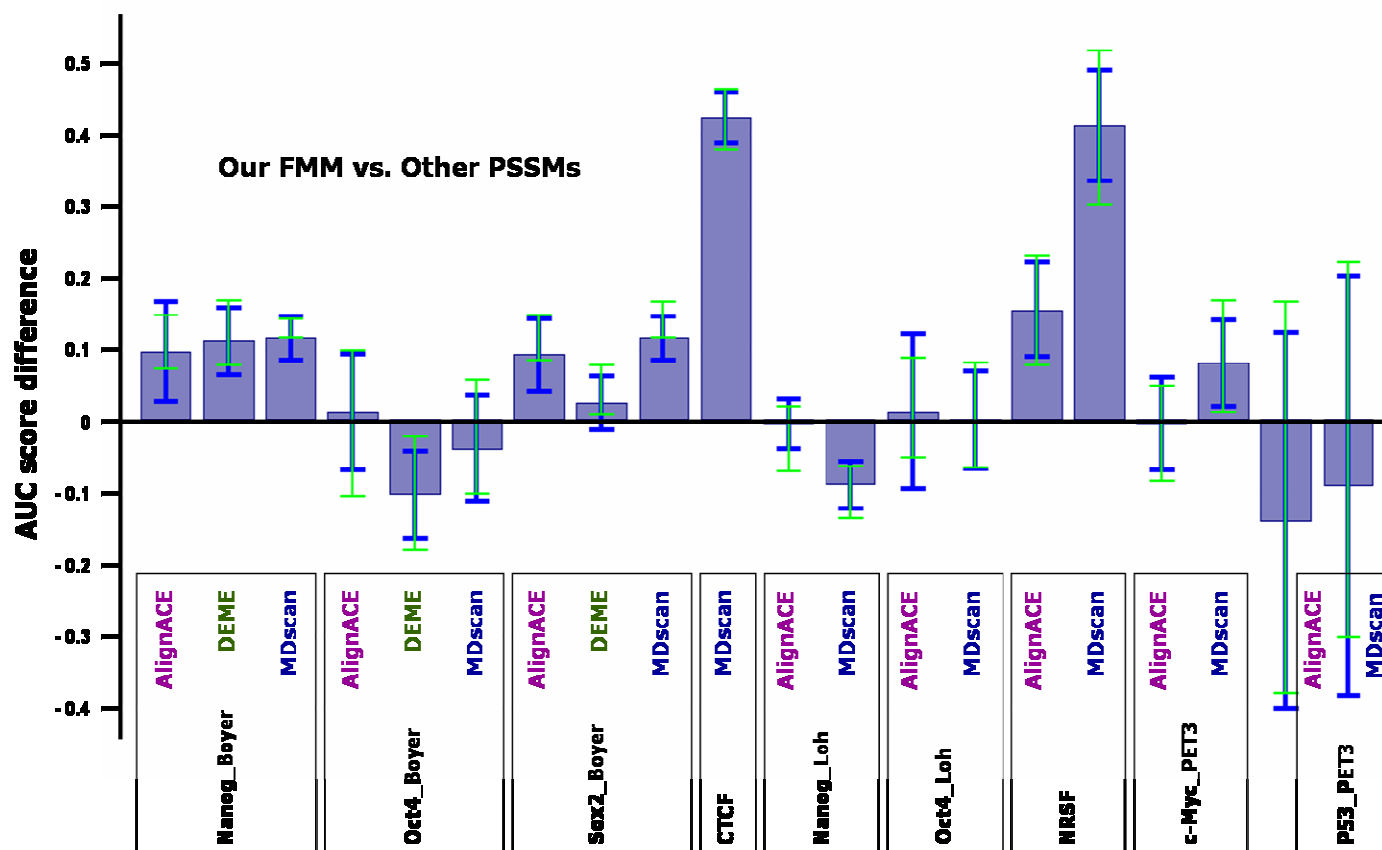

**Differences between AUC Scores of our FMMs and the other motif finders PSSMs.** The means and the standard deviations (calculated over the five CV groups) of the difference between our FMM AUC score and the other tool PSM AUC score. The blue bars and error bars are for AUC scores based on the test data. The light green error bars are for AUC scores based on the train data.

**Figure S8**

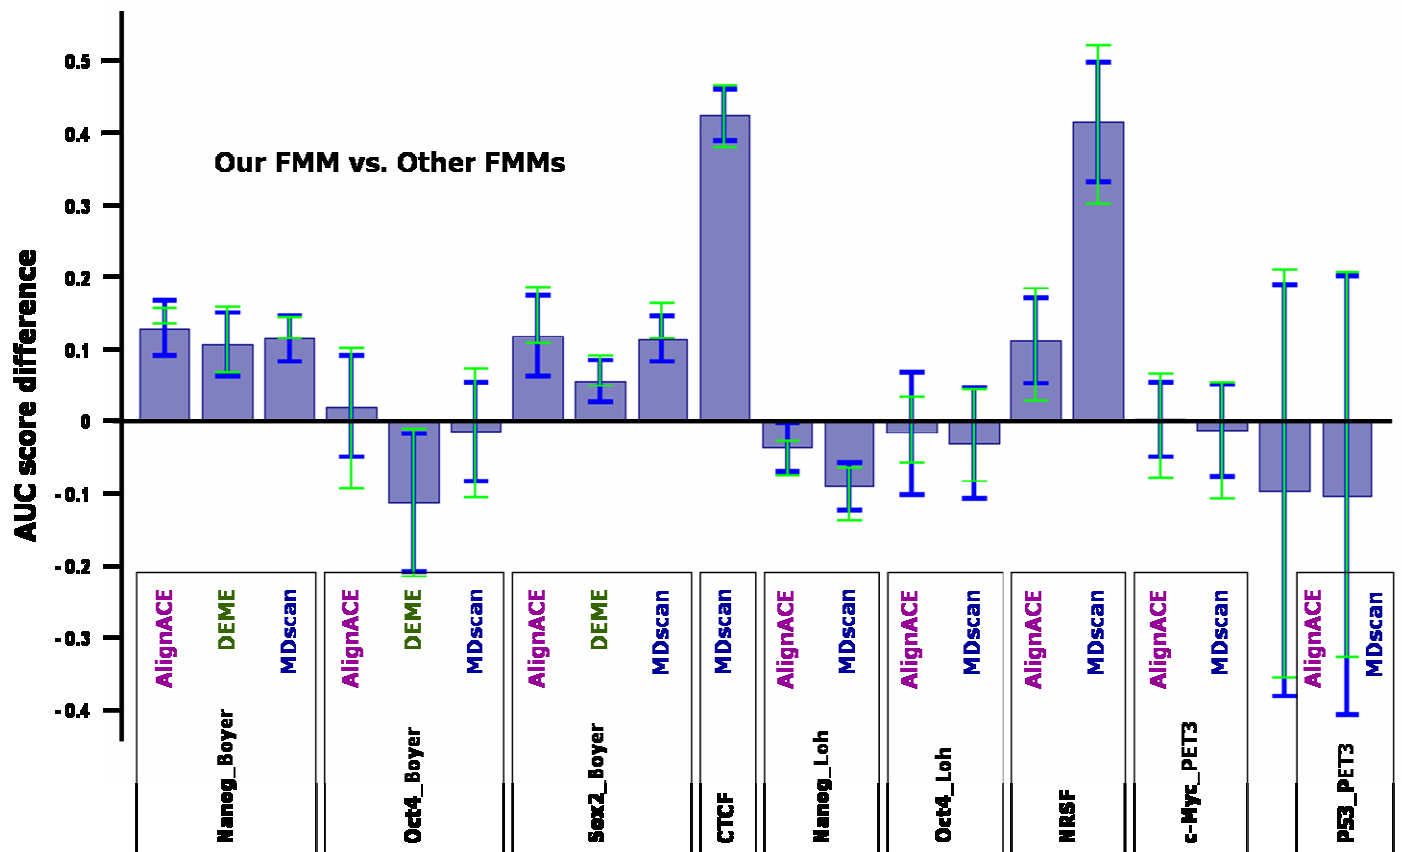

**Differences between AUC Scores of our FMMs and the other motif finders FMMs.** The means and the standard deviations (calculated over the five CV groups) of the difference between our FMM AUC score and the other tool FMM AUC score. The blue bars and error bars are for AUC scores based on the test data. The light green error bars are for AUC scores based on the train data.

**Figure S2**

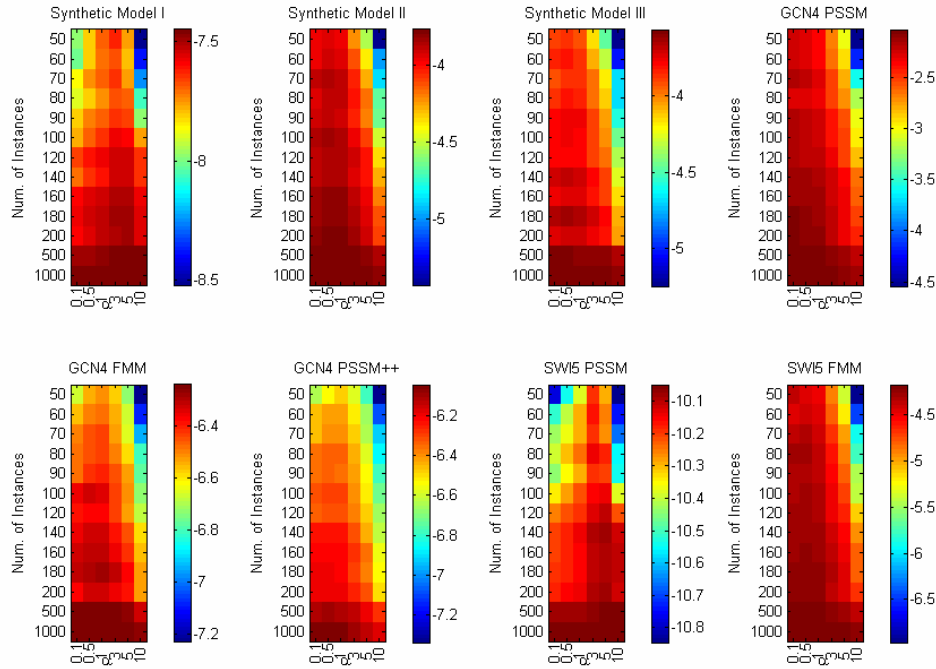

**Evaluation Of The L1 Penalty Term Free Parameter On Synthetic Data.** FMM model performance in terms of the average test set likelihood on 8 synthetic data sets (sampled from the models in Figure 3) as a function of the number of data instances and the L1 penalty free parameter ( $\alpha$ ). We observed that the effect of the value of  $\alpha$  is, as predicted much stronger on small datasets. Where too small values of  $\alpha$  might not prevent overfitting (those resulting in low average test likelihood), too large values might pose to harsh restriction on the learned features. However relatively small values of  $\alpha$  ( $\alpha=1$ ) have prevented overfitting for PSSM sampled datasets of size 1000. Base on this results we selected the value 1, which gave relatively good performances on all datasets, for our runs.

**De-Novo Motifs.** **Figures S9-S23** show a summary of the de-novo found motifs in the examined human and mouse data sets, which are described in **Table 1**.

**Figure S9**

| Data set: c-Myc |      |      |      |      |                    |                                                                                      |                                                                                       |
|-----------------|------|------|------|------|--------------------|--------------------------------------------------------------------------------------|---------------------------------------------------------------------------------------|
| Index           | P    | PH   | N    | NH   | MHG P-val          | PSSM                                                                                 | FMM                                                                                   |
| 1               | 3996 | 1487 | 7992 | 1072 | $10^{-189}$        | 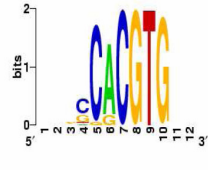   |    |
| 2               | 3996 | 711  | 7992 | 1014 | $3 \cdot 10^{-16}$ |    |    |
| 3               | 3996 | 547  | 7992 | 768  | $4 \cdot 10^{-15}$ |   |   |
| 4               | 3996 | 338  | 7992 | 407  | $2 \cdot 10^{-14}$ |  |  |
| 5               | 3996 | 322  | 7992 | 390  | $10^{-12}$         |  |  |

**A summary of all de-novo found motifs for the c-Myc dataset.** “P”/“N” stand for the number of positive/negative sequences, “PH”/“NH” stand for the number of positive/negative sequences in which there is a KMM hit.

**Figure S10**

| Data set: c-Myc_PET3 |     |     |      |     |                    |                                                                                      |                                                                                       |
|----------------------|-----|-----|------|-----|--------------------|--------------------------------------------------------------------------------------|---------------------------------------------------------------------------------------|
| Index                | P   | PH  | N    | NH  | MHG P-val          | PSSM                                                                                 | FMM                                                                                   |
| 1                    | 528 | 145 | 1056 | 69  | $10^{-30}$         | 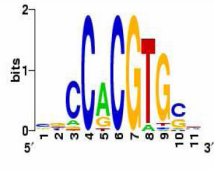   |    |
| 2                    | 528 | 243 | 1056 | 298 | $10^{-19}$         |    |    |
| 3                    | 528 | 351 | 1056 | 537 | $2 \cdot 10^{-13}$ |    |    |
| 4                    | 528 | 232 | 1056 | 364 | $5 \cdot 10^{-13}$ |   |   |
| 5                    | 528 | 72  | 1056 | 45  | $3 \cdot 10^{-11}$ |  |  |

**A summary of all de-novo found motifs for the c-Myc\_PET3 dataset.** “P”/“N” stand for the number of positive/negative sequences, “PH”/“NH” stand for the number of positive/negative sequences in which there is a KMM hit.

**Figure S11**

| Data set: CTCF |       |       |       |       |             |                                                                                      |                                                                                       |
|----------------|-------|-------|-------|-------|-------------|--------------------------------------------------------------------------------------|---------------------------------------------------------------------------------------|
| Index          | P     | PH    | N     | NH    | MHG P-val   | PSSM                                                                                 | FMM                                                                                   |
| 1              | 13721 | 8235  | 27442 | 4750  | $\sim 0$    | 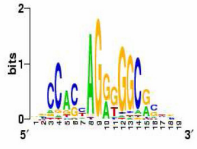   |    |
| 2              | 13721 | 4257  | 27442 | 4445  | $10^{-265}$ |    |    |
| 3              | 13721 | 10370 | 27442 | 16953 | $10^{-248}$ |    |    |
| 4              | 13721 | 7907  | 27442 | 11925 | -172        |   |   |
| 5              | 13721 | 3031  | 27442 | 3481  | $10^{-131}$ |  |  |

**A summary of all de-novo found motifs for the CTCF dataset.** “P”/“N” stand for the number of positive/negative sequences, “PH”/“NH” stand for the number of positive/negative sequences in which there is a KMM hit.

**Figure S12**

| Data set: E2F4_Boyer |     |     |     |     |             |                                                                                      |                                                                                       |
|----------------------|-----|-----|-----|-----|-------------|--------------------------------------------------------------------------------------|---------------------------------------------------------------------------------------|
| Index                | P   | PH  | N   | NH  | MHG P-val   | PSSM                                                                                 | FMM                                                                                   |
| 1                    | 956 | 891 | 956 | 298 | $10^{-231}$ | 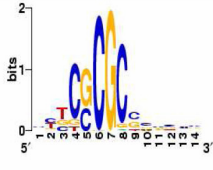   |    |
| 2                    | 956 | 886 | 956 | 617 | $10^{-81}$  |    |    |
| 3                    | 956 | 463 | 956 | 175 | $10^{-47}$  |    |    |
| 4                    | 956 | 441 | 956 | 217 | $10^{-39}$  |   |   |
| 5                    | 956 | 226 | 956 | 69  | $10^{-24}$  |  |  |

**A summary of all de-novo found motifs for the E2F4\_Boyer dataset.** “P”/“N” stand for the number of positive/negative sequences, “PH”/“NH” stand for the number of positive/negative sequences in which there is a KMM hit.

**Figure S13**

| Data set: NANOG_Boyer |      |      |      |      |            |                                                                                      |                                                                                       |
|-----------------------|------|------|------|------|------------|--------------------------------------------------------------------------------------|---------------------------------------------------------------------------------------|
| Index                 | P    | PH   | N    | NH   | MHG P-val  | PSSM                                                                                 | FMM                                                                                   |
| 1                     | 1552 | 164  | 3104 | 4    | $10^{-74}$ | 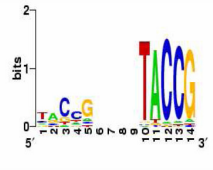   |    |
| 2                     | 1552 | 1188 | 3104 | 1804 | $10^{-49}$ |    |    |
| 3                     | 1552 | 551  | 3104 | 578  | $10^{-44}$ |    |    |
| 4                     | 1552 | 739  | 3104 | 1039 | $10^{-25}$ |   |   |
| 5                     | 1552 | 501  | 3104 | 659  | $10^{-17}$ |  |  |

**A summary of all de-novo found motifs for the NANOG\_Boyer dataset.**

“P”/“N” stand for the number of positive/negative sequences, “PH”/“NH” stand for the number of positive/negative sequences in which there is a KMM hit.



**Figure S14**

| Data set: NANOG_Loh |      |      |      |      |             |                                                                                      |                                                                                       |
|---------------------|------|------|------|------|-------------|--------------------------------------------------------------------------------------|---------------------------------------------------------------------------------------|
| Index               | P    | PH   | N    | NH   | MHG P-val   | PSSM                                                                                 | FMM                                                                                   |
| 1                   | 2823 | 1250 | 5646 | 1245 | $10^{-109}$ | 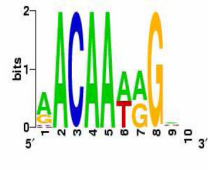   |    |
| 2                   | 2823 | 441  | 5646 | 263  | $10^{-62}$  |    |    |
| 3                   | 2823 | 606  | 5646 | 579  | $10^{-43}$  |    |    |
| 4                   | 2823 | 88   | 5646 | 0    | $10^{-42}$  |   |   |
| 5                   | 2823 | 1569 | 5646 | 2393 | $10^{-41}$  |  |  |

**A summary of all de-novo found motifs for the NANOG\_Loh dataset.** “P”/“N” stand for the number of positive/negative sequences, “PH”/“NH” stand for the number of positive/negative sequences in which there is a KMM hit.

**Figure S15**

| Data set: NRSF |      |      |      |     |                    |                                                                                      |                                                                                       |
|----------------|------|------|------|-----|--------------------|--------------------------------------------------------------------------------------|---------------------------------------------------------------------------------------|
| Index          | P    | PH   | N    | NH  | MHG P-val          | PSSM                                                                                 | FMM                                                                                   |
| 1              | 1872 | 1630 | 3744 | 358 | $\sim 0$           | 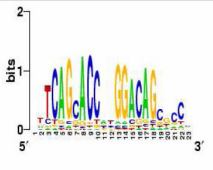   |    |
| 2              | 1872 | 245  | 3744 | 195 | $10^{-23}$         |    |    |
| 3              | 1872 | 63   | 3744 | 10  | $10^{-20}$         |    |    |
| 4              | 1872 | 138  | 3744 | 119 | $2 \cdot 10^{-12}$ |   |   |
| 5              | 1872 | 198  | 3744 | 212 | $6 \cdot 10^{-12}$ |  |  |

**A summary of all de-novo found motifs for the NRSF dataset.** “P”/“N” stand for the number of positive/negative sequences, “PH”/“NH” stand for the number of positive/negative sequences in which there is a KMM hit.

**Figure S16**

| Data set: OCT4_Boyer |     |     |      |     |                    |                                                                                      |                                                                                       |
|----------------------|-----|-----|------|-----|--------------------|--------------------------------------------------------------------------------------|---------------------------------------------------------------------------------------|
| Index                | P   | PH  | N    | NH  | MHG P-val          | PSSM                                                                                 | FMM                                                                                   |
| 1                    | 603 | 349 | 1206 | 327 | $10^{-40}$         | 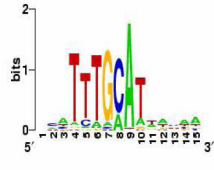   |    |
| 2                    | 603 | 521 | 1206 | 884 | $2 \cdot 10^{-14}$ |    |    |
| 3                    | 603 | 22  | 1206 | 0   | $3 \cdot 10^{-11}$ |    |    |
| 4                    | 603 | 64  | 1206 | 46  | $6 \cdot 10^{-9}$  |   |   |
| 5                    | 603 | 219 | 1206 | 316 | $2 \cdot 10^{-6}$  |  |  |

**A summary of all de-novo found motifs for the OCT4\_Boyer dataset.** “P”/“N” stand for the number of positive/negative sequences, “PH”/“NH” stand for the number of positive/negative sequences in which there is a KMM hit.

**Figure S17**

| Data set: OCT4_Loh |     |     |      |      |                    |                                                                                      |                                                                                       |
|--------------------|-----|-----|------|------|--------------------|--------------------------------------------------------------------------------------|---------------------------------------------------------------------------------------|
| Index              | P   | PH  | N    | NH   | MHG P-val          | PSSM                                                                                 | FMM                                                                                   |
| 1                  | 968 | 517 | 1936 | 474  | $10^{-58}$         | 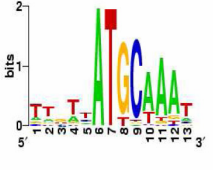   |    |
| 2                  | 968 | 696 | 1936 | 997  | $10^{-28}$         |    |    |
| 3                  | 968 | 437 | 1936 | 536  | $10^{-23}$         |    |    |
| 4                  | 968 | 714 | 1936 | 1242 | $4 \cdot 10^{-14}$ |   |   |
| 5                  | 968 | 291 | 1936 | 383  | $6 \cdot 10^{-11}$ |  |  |

**A summary of all de-novo found motifs for the OCT4\_Loh dataset.** “P”/“N” stand for the number of positive/negative sequences, “PH”/“NH” stand for the number of positive/negative sequences in which there is a KMM hit.

**Figure S18**

| Data set: P53 |     |     |      |     |                    |                                                                                      |                                                                                       |
|---------------|-----|-----|------|-----|--------------------|--------------------------------------------------------------------------------------|---------------------------------------------------------------------------------------|
| Index         | P   | PH  | N    | NH  | MHG P-val          | PSSM                                                                                 | FMM                                                                                   |
| 1             | 503 | 433 | 1006 | 163 | $10^{-164}$        | 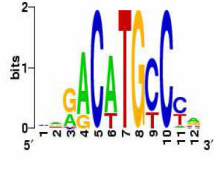   |    |
| 2             | 503 | 194 | 1006 | 198 | $10^{-20}$         |    |    |
| 3             | 503 | 115 | 1006 | 88  | $10^{-18}$         |    |    |
| 4             | 503 | 130 | 1006 | 134 | $3 \cdot 10^{-14}$ |   |   |
| 5             | 503 | 95  | 1006 | 94  | $5 \cdot 10^{-9}$  |  |  |

**A summary of all de-novo found motifs for the P53 dataset.** “P”/“N” stand for the number of positive/negative sequences, “PH”/“NH” stand for the number of positive/negative sequences in which there is a KMM hit.

**Figure S19**

| Data set: P53_PET3 |     |     |     |     |                    |                                                                                      |                                                                                       |
|--------------------|-----|-----|-----|-----|--------------------|--------------------------------------------------------------------------------------|---------------------------------------------------------------------------------------|
| Index              | P   | PH  | N   | NH  | MHG P-val          | PSSM                                                                                 | FMM                                                                                   |
| 1                  | 300 | 228 | 600 | 66  | $10^{-87}$         | 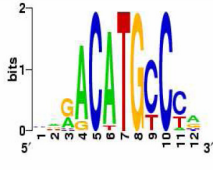   |    |
| 2                  | 300 | 86  | 600 | 2   | $10^{-41}$         |    |    |
| 3                  | 300 | 64  | 600 | 51  | $2 \cdot 10^{-10}$ |    |    |
| 4                  | 300 | 99  | 600 | 114 | $10^{-10}$         |   |   |
| 5                  | 300 | 66  | 600 | 49  | $2 \cdot 10^{-9}$  |  |  |

**A summary of all de-novo found motifs for the P53\_PET3 dataset.** “P”/“N” stand for the number of positive/negative sequences, “PH”/“NH” stand for the number of positive/negative sequences in which there is a KMM hit.

**Figure S20**

| Data set: PRC2_SUZ12 |      |      |      |      |             |                                                                                     |                                                                                      |
|----------------------|------|------|------|------|-------------|-------------------------------------------------------------------------------------|--------------------------------------------------------------------------------------|
| Index                | P    | PH   | N    | NH   | MHG P-val   | PSSM                                                                                | FMM                                                                                  |
| 1                    | 2905 | 2315 | 2905 | 971  | $10^{-317}$ | 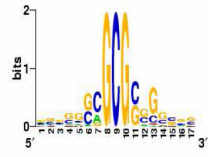  |   |
| 2                    | 2905 | 2162 | 2905 | 1428 | $10^{-120}$ |   |   |
| 3                    | 2905 | 991  | 2905 | 497  | $10^{-53}$  |   |   |
| 4                    | 2905 | 428  | 2905 | 154  | $10^{-34}$  |  |  |

**A summary of all de-novo found motifs for the PRC2\_SUZ12 dataset.** “P”/“N” stand for the number of positive/negative sequences, “PH”/“NH” stand for the number of positive/negative sequences in which there is a KMM hit.

**Figure S21**

| Data set: SOX2_Boyer |      |     |      |      |                    |                                                                                      |                                                                                       |
|----------------------|------|-----|------|------|--------------------|--------------------------------------------------------------------------------------|---------------------------------------------------------------------------------------|
| Index                | P    | PH  | N    | NH   | MHG P-val          | PSSM                                                                                 | FMM                                                                                   |
| 1                    | 1165 | 686 | 2330 | 678  | $10^{-72}$         | 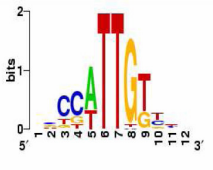   |    |
| 2                    | 1165 | 600 | 2330 | 831  | $10^{-25}$         |    |    |
| 3                    | 1165 | 354 | 2330 | 390  | $10^{-22}$         |    |    |
| 4                    | 1165 | 739 | 2330 | 1189 | $10^{-14}$         |   |   |
| 5                    | 1165 | 149 | 2330 | 130  | $2 \cdot 10^{-13}$ |  |  |

**A summary of all de-novo found motifs for the SOX2\_Boyer dataset.** “P”/“N” stand for the number of positive/negative sequences, “PH”/“NH” stand for the number of positive/negative sequences in which there is a KMM hit.



**Figure S22**

| Data set: STAT1_IFNg |       |      |       |      |             |                                                                                      |                                                                                       |
|----------------------|-------|------|-------|------|-------------|--------------------------------------------------------------------------------------|---------------------------------------------------------------------------------------|
| Index                | P     | PH   | N     | NH   | MHG P-val   | PSSM                                                                                 | FMM                                                                                   |
| 1                    | 15000 | 4392 | 15000 | 1895 | $10^{-303}$ | 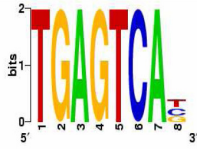   |    |
| 2                    | 15000 | 4347 | 15000 | 2055 | $10^{-289}$ |    |    |
| 3                    | 15000 | 2265 | 15000 | 601  | $10^{-252}$ |    |    |
| 4                    | 15000 | 3425 | 15000 | 1913 | $10^{-123}$ |   |   |
| 5                    | 15000 | 2074 | 15000 | 1179 | $10^{-64}$  |  |  |
| 6                    | 15000 | 868  | 15000 | 378  | $10^{-47}$  |  |  |

**A summary of all de-novo found motifs for the STAT1\_IFNg dataset.** “P”/“N” stand for the number of positive/negative sequences, “PH”/“NH” stand for the number of positive/negative sequences in which there is a KMM hit.

**Figure S23**

| Data set: STAT1_Unstimulated |       |      |       |      |             |                                                                                     |                                                                                      |
|------------------------------|-------|------|-------|------|-------------|-------------------------------------------------------------------------------------|--------------------------------------------------------------------------------------|
| Index                        | P     | PH   | N     | NH   | MHG P-val   | PSSM                                                                                | FMM                                                                                  |
| 1                            | 11004 | 4581 | 22008 | 3745 | $\sim 0$    | 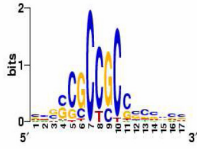  |   |
| 2                            | 11004 | 1390 | 22008 | 691  | $10^{-253}$ |   |   |
| 3                            | 11004 | 2074 | 22008 | 1747 | $10^{-196}$ |   |   |
| 4                            | 11004 | 933  | 22008 | 689  | $10^{-94}$  |  |  |

**A summary of all de-novo found motifs for the STAT1\_Unstimulated dataset.** “P”/“N” stand for the number of positive/negative sequences, “PH”/“NH” stand for the number of positive/negative sequences in which there is a KMM hit

## References

1. Hughes JD, Estep PW, Tavazoie S, Church GM (2000) Computational identification of cis-regulatory elements associated with groups of functionally related genes in *Saccharomyces cerevisiae*. *J Mol Biol* 296(5): 1205-1214.
2. Liu XS, Brutlag DL, Liu JS (2002) An algorithm for finding protein-DNA binding sites with applications to chromatin-immunoprecipitation microarray experiments. *Nature Biotechnology* 20: 835-839.
3. Redhead E, Bailey TL (2007) Discriminative motif discovery in DNA and protein sequences using the DEME algorithm. *BMC Bioinformatics* 8: 385-403.
